# Supplementary material for: Stabilizing lithium metal anode by octaphenyl polyoxyethylene-lithium complexation
Source: PubMed Central journal article supplement (PMC6994683; doi:10.1038/s41467-020-14505-8), 2020-01-31
Supplement: 41467_2020_14505_MOESM1_ESM.pdf [file 41467_2020_14505_MOESM1_ESM.pdf]

## **Supplementary Information**

### **Stabilizing lithium metal anode by octaphenyl polyoxyethylene complexation**

Dai et al.

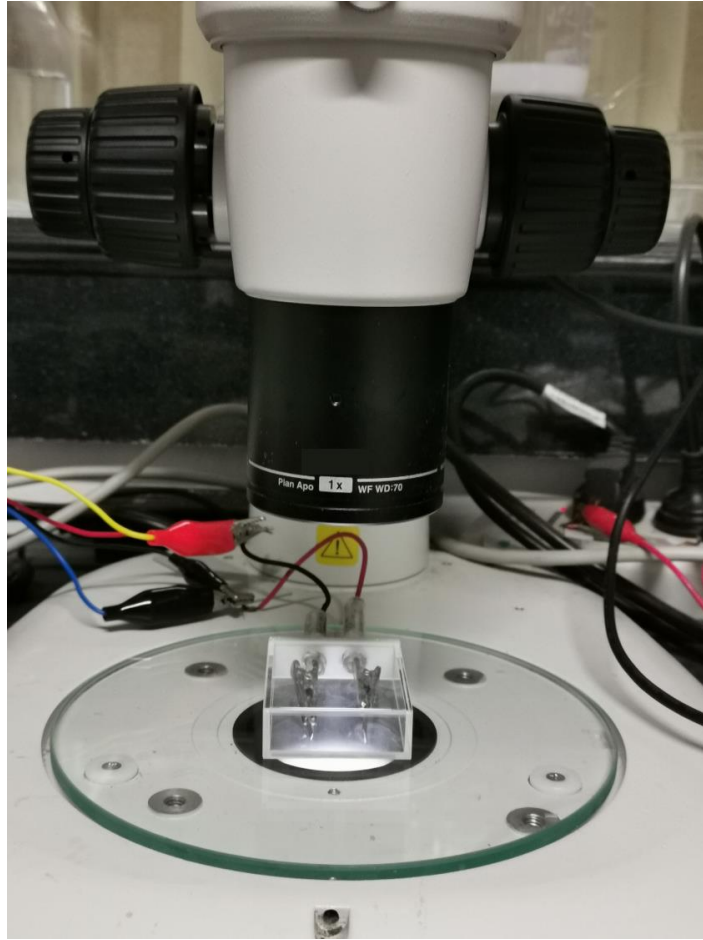

**Supplementary Figure 1.** Digital photo of *in situ* optical microscopy.

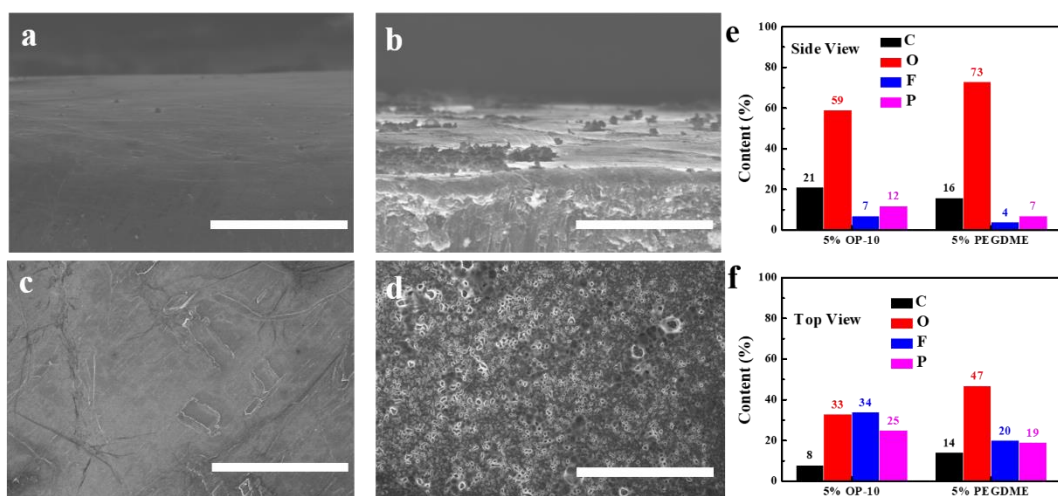

**Supplementary Figure 2.** Morphology and element characterizations of metal Li anode. SEM images of Li anode with OP-10 additives (**a**, **c**) or with PEGDME additives (**b**, **d**) after 3 cycles (**a**, **b**: side view; **c**, **d**: top view); Elements content of Li surface using various additives measured by EDX method after 3 cycles (**e**, **f**) (Scale bars: **a–d** 100  $\mu\text{m}$ ).

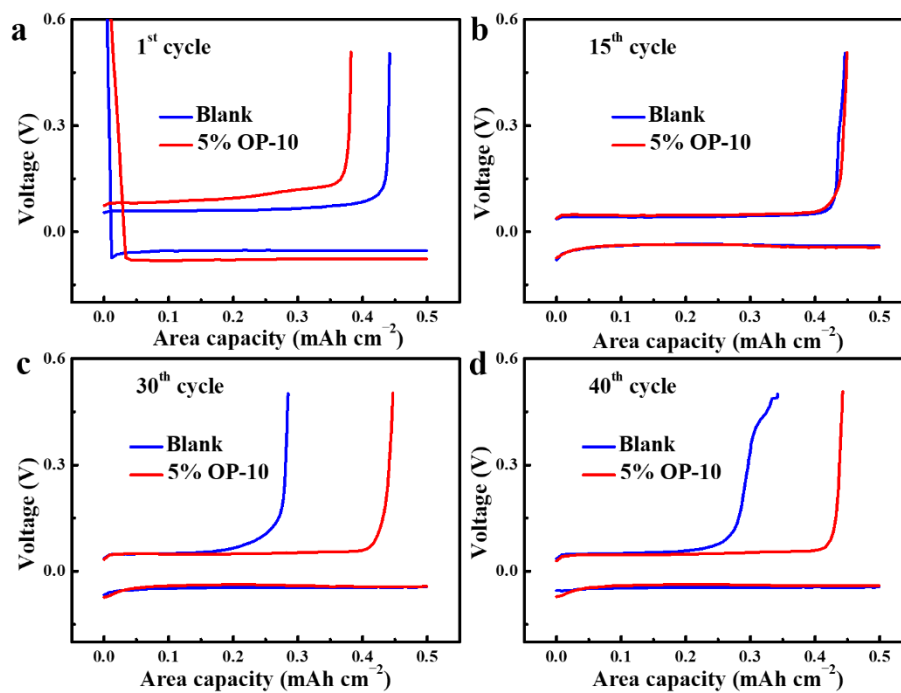

**Supplementary Figure 3.** Coulombic efficiency in different electrolyte systems. The voltage profiles of the 1<sup>st</sup> (a), 15<sup>th</sup> (b), 30<sup>th</sup> (c), and 40<sup>th</sup> (d) cycles in different electrolyte systems with a cycling capacity of  $0.5 \text{ mAh cm}^{-2}$  at a current density of  $0.5 \text{ mA cm}^{-2}$ .

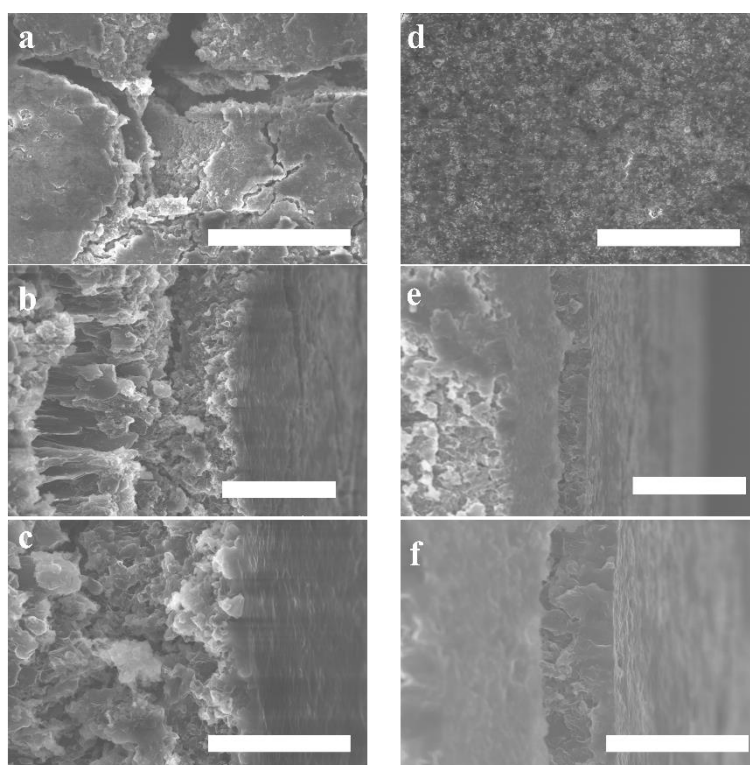

**Supplementary Figure 4.** Morphology characterizations of metal Li anode. SEM images of Li anode plated without OP-10 additives (**a, b, c**) or with OP-10 additives (**d, e, f**) after 50 cycles at a current density of  $4 \text{ mA cm}^{-2}$  with a fixed capacity of  $1 \text{ mAh cm}^{-2}$  (**a, d**: top view; **b, c, e, f**: side view. Scale bars: **a**  $50 \mu\text{m}$ , **b**  $20 \mu\text{m}$ , **c**  $10 \mu\text{m}$ , **d**  $50 \mu\text{m}$ , **e**  $20 \mu\text{m}$ , **f**  $10 \mu\text{m}$ ).

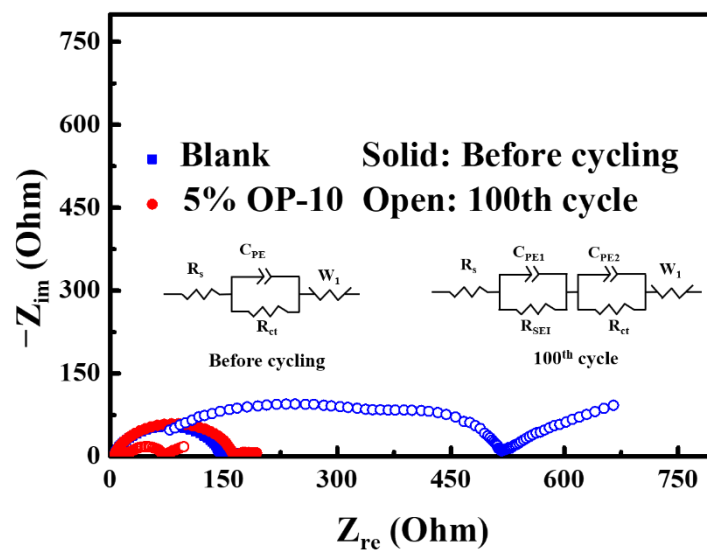

**Supplementary Figure 5.** Electrochemical impedance spectroscopy (EIS) results for blank and modified electrolytes before and after cycling at a current density of  $2 \text{ mA cm}^{-2}$  and a fixed capacity of  $1 \text{ mA cm}^{-2}$ . Inset figures corresponding to the equivalent circuits of the electrochemical impedance spectroscopy.

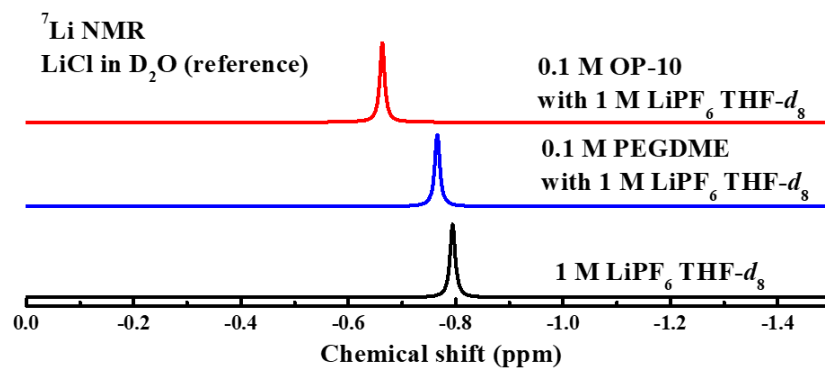

**Supplementary Figure 6.** <sup>7</sup>Li NMR spectra of LiPF<sub>6</sub> with different additives.

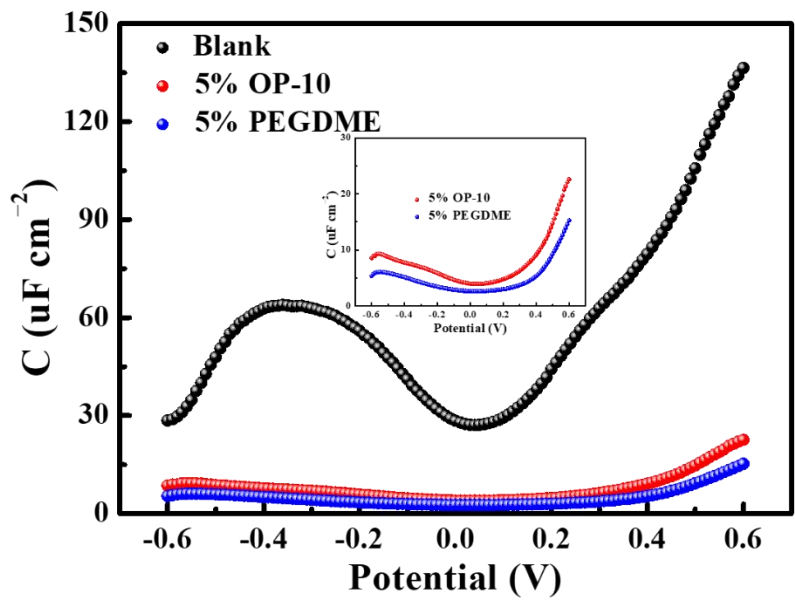

**Supplementary Figure 7.** Differential capacitance curves conducted at 298 K with or without OP-10 or PEGDME additives.



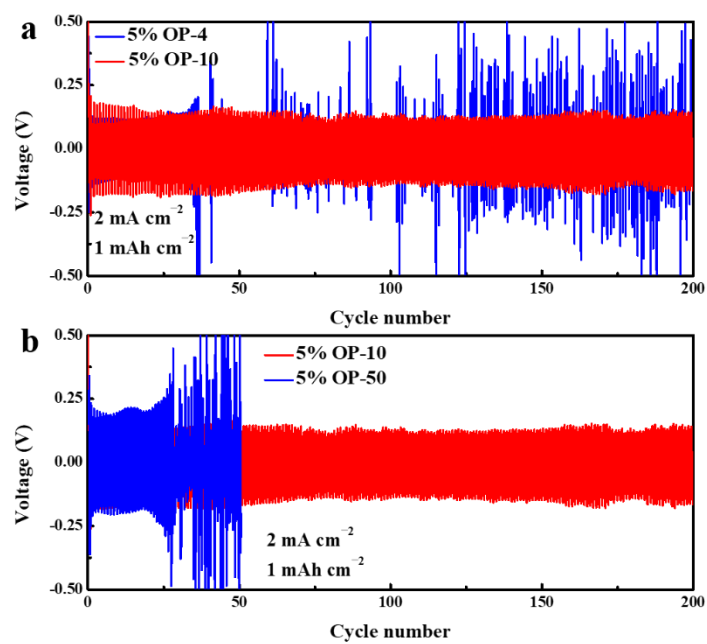

**Supplementary Figure 8.** Electrochemical performance with different kinds of OP additives. Cycling performance of Li|Li symmetric cells containing additives of OP-10 (red) versus OP-4 (a) and OP-50 (b) (blue).

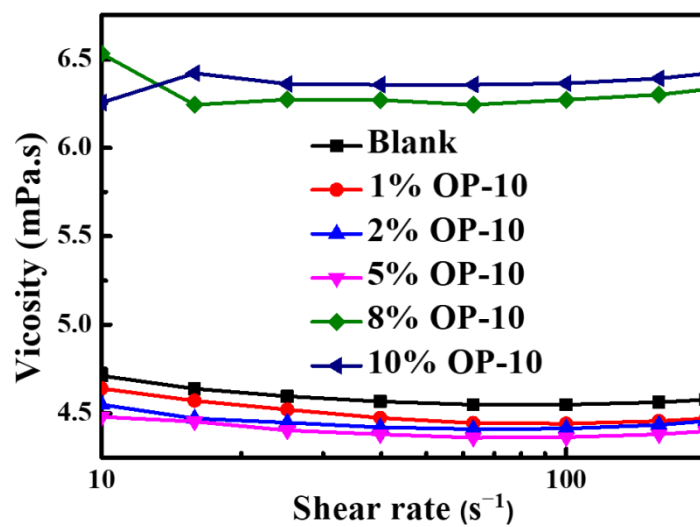

**Supplementary Figure 9.** Viscosities of OP-10 electrolyte additive with different concentrations.

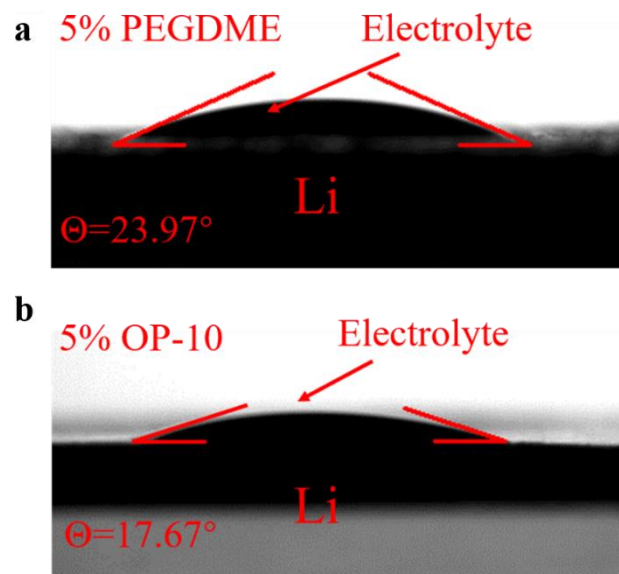

**Supplementary Figure 10.** Measurements of contact angles. Contact angles of the electrolyte with 5% PEGDME (**a**) and 5% OP-10 (**b**) additives on lithium anode.

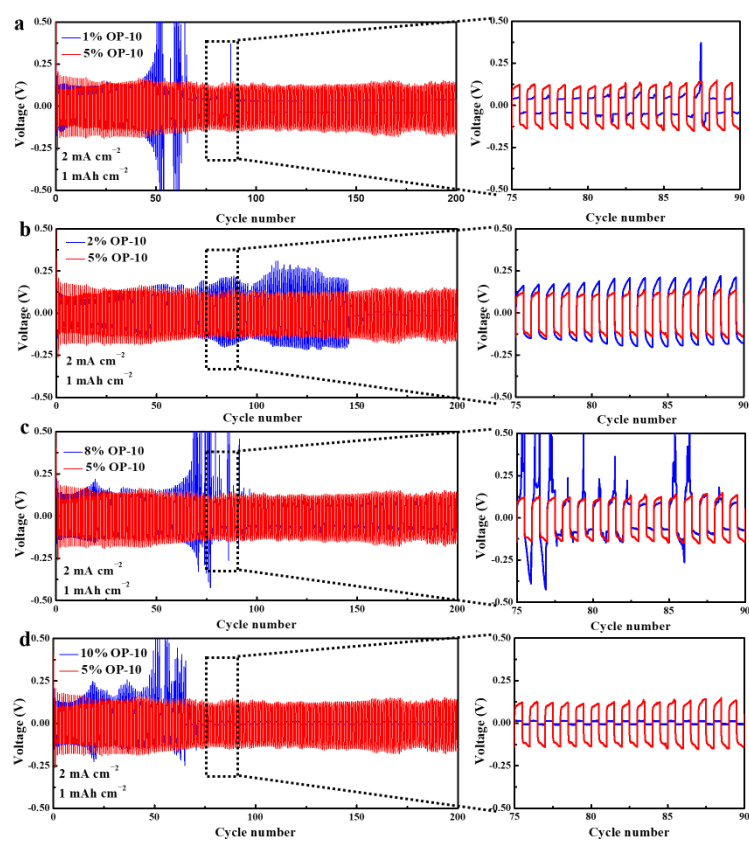

**Supplementary Figure 11.** Electrochemical performance of Li|Li symmetric cells. Cycling performance of Li|Li cells using 1% (a), 2% (b), 8% (c) and 10% (d) OP-10 additive.

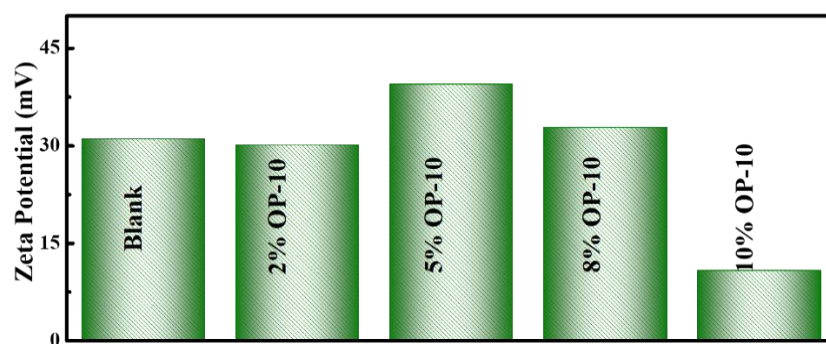

**Supplementary Figure 12.** Zeta potential of lithium without or with OP-10 additives at different concentration.

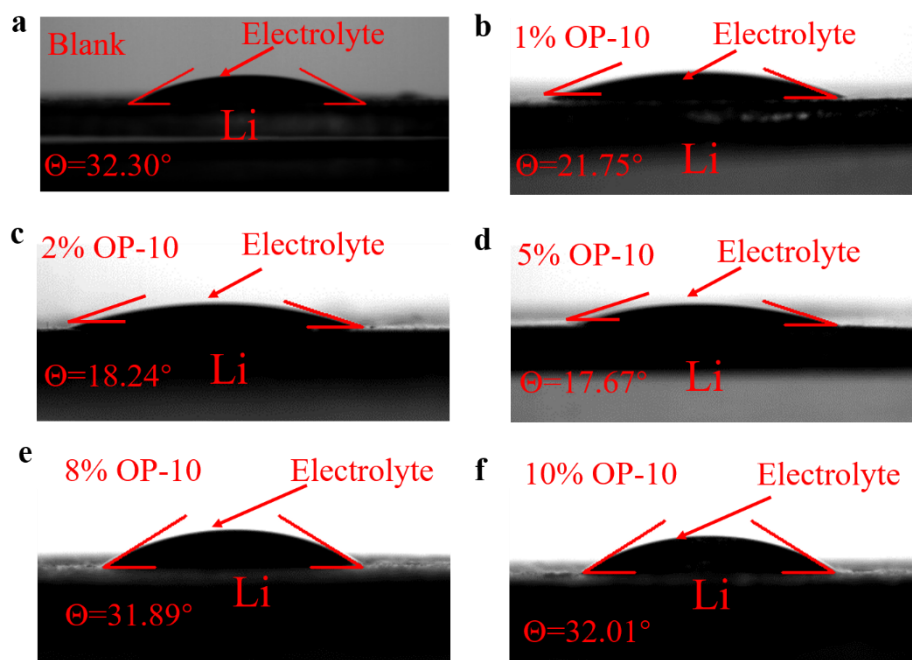

**Supplementary Figure 13.** Measurements of contact angles. Contact angles of electrolytes with 1% (a), 2% (b), 8% (c) and 10% (d) OP-10 additive on lithium anode.

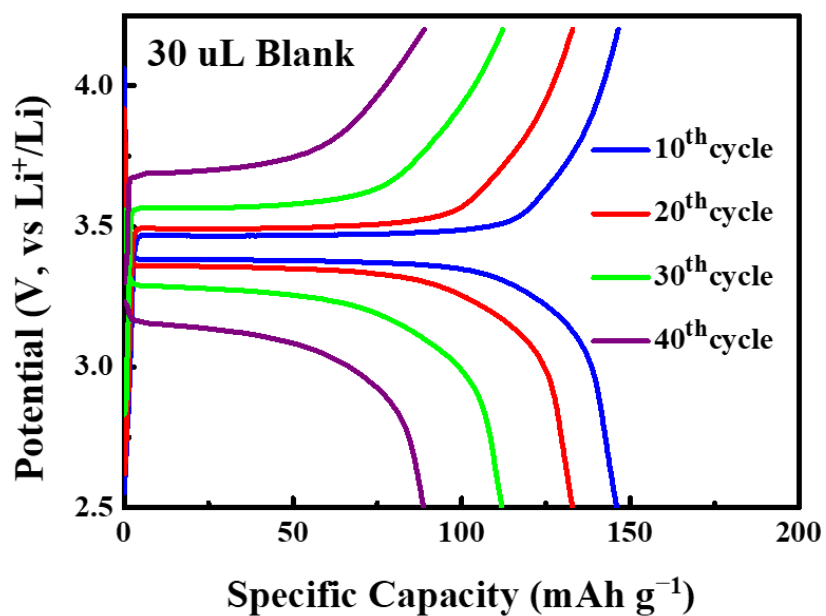

**Supplementary Figure 14.** Charge-discharge profiles of the as-assembled Li|LiFePO<sub>4</sub> batteries with untreated electrolyte corresponding to Fig. 6a.

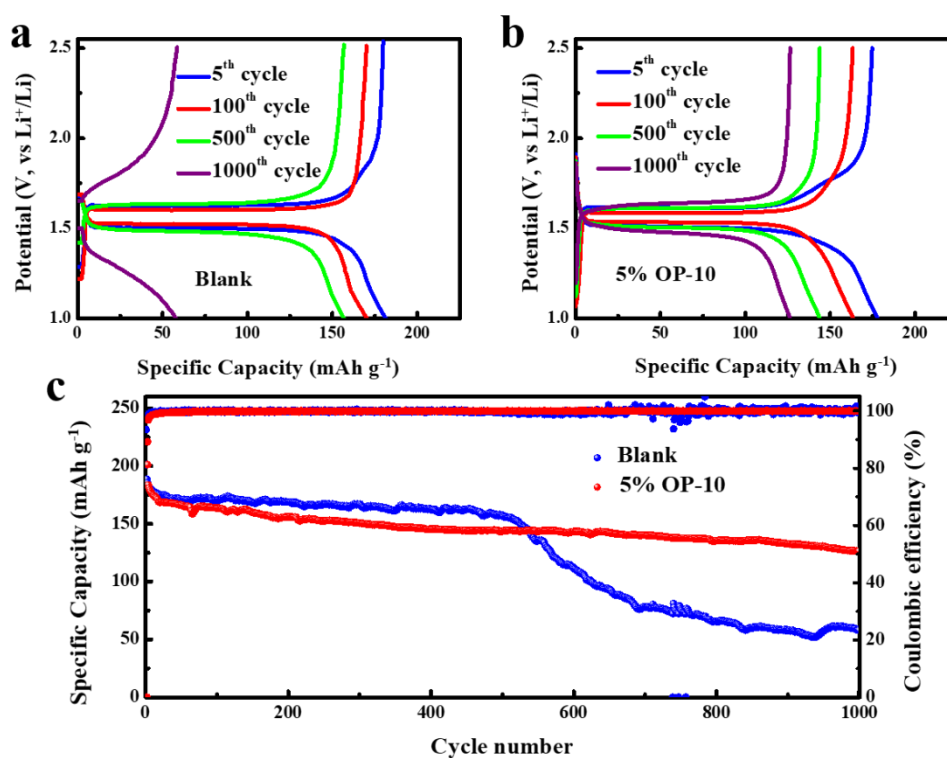

**Supplementary Figure 15.** Electrochemical performances of  $\text{Li}|\text{Li}_4\text{Ti}_5\text{O}_{12}$  batteries with untreated electrolyte (blue) or with OP-10 additives (red). Charge-discharge profiles of  $\text{Li}_4\text{Ti}_5\text{O}_{12}$  batteries with untreated electrolyte (a) or with OP-10 additives (b) at 5 C; (c) Long-term cycling stability of  $\text{Li}|\text{Li}_4\text{Ti}_5\text{O}_{12}$  batteries with untreated electrolyte or with OP-10 additives at a current density of 5 C. (1 C =  $175 \text{ mA g}^{-1}$ ).



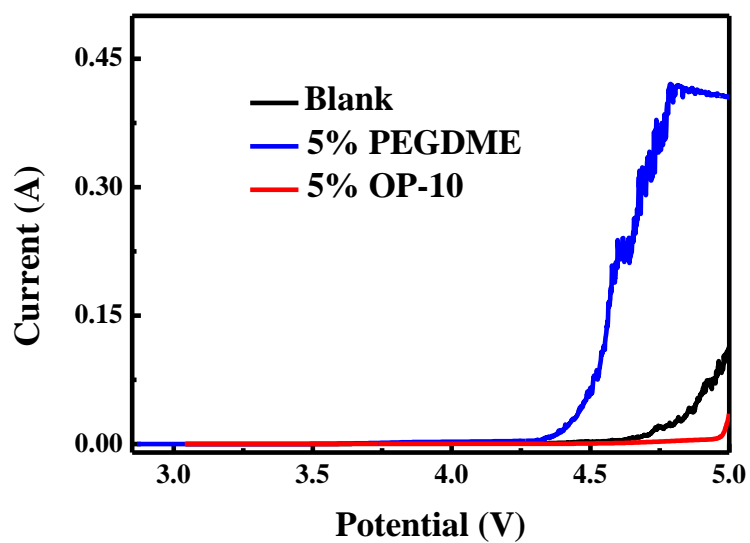

**Supplementary Figure 16.** Linear sweep voltammetry (LSV) curves of Li|Cu cells assembled with or without OP-10/PEGDME at a scan rate of  $10 \text{ mV s}^{-1}$ .

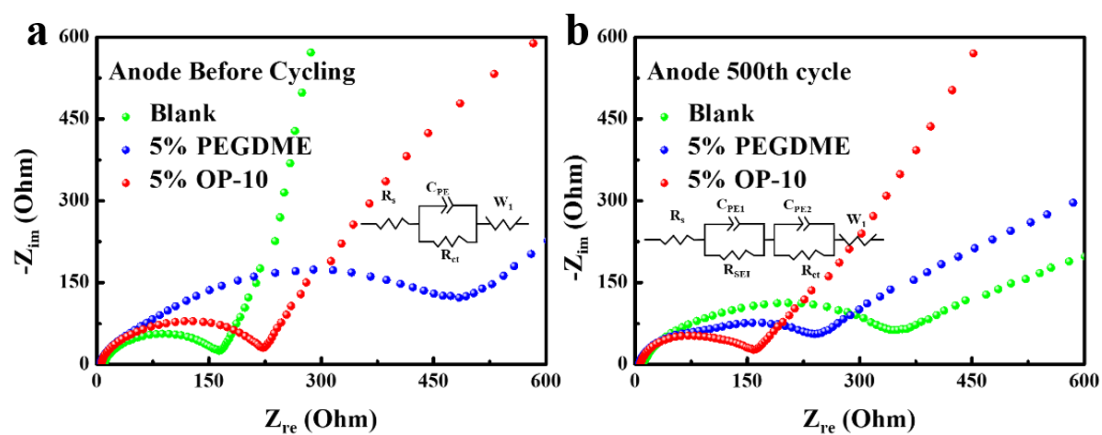

**Supplementary Figure 17.** EIS measurements of Li anode in Li|LiFePO<sub>4</sub> battery. Nyquist plots before cycling (**a**) and after 500 cycles (**b**) using electrolyte with or without additives. Inset figures are the equivalent circuits of the electrode impedance spectra.

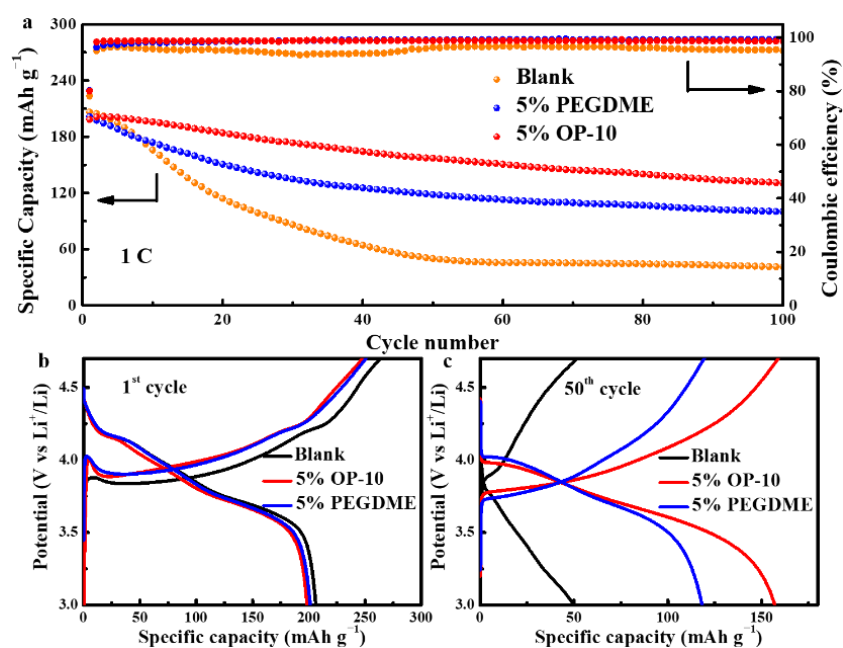

**Supplementary Figure 18.** Electrochemical performance of Li|LiNi<sub>0.8</sub>Co<sub>0.1</sub>Mn<sub>0.1</sub>O<sub>2</sub> batteries in different electrolyte systems. Cycling performance of Li|LiNi<sub>0.8</sub>Co<sub>0.1</sub>Mn<sub>0.1</sub>O<sub>2</sub> full cells with or without OP-10/PEGDME additives at a current density of 1 C (1 C = 280 mAh g<sup>-1</sup>) (a); Charge-discharge profiles of Li|LiNi<sub>0.8</sub>Co<sub>0.1</sub>Mn<sub>0.1</sub>O<sub>2</sub> full cell in different electrolyte systems (b–c).

**Supplementary Table 1.** The comparisons of the bare Li foil between our work and previous reports

| Electrolyte additives                | Current density (mA cm <sup>-2</sup> ) | Areal capacity (mAh cm <sup>-2</sup> ) | Overpotential (mV) | Cycle number | Ref.        |
|--------------------------------------|----------------------------------------|----------------------------------------|--------------------|--------------|-------------|
| 1.0 M (Pyr1(12) FSI                  | 0.5                                    | 2.0                                    | 30                 | ~110         | 1           |
| 0.05 M LiPF <sub>6</sub> + dual-salt | 1.0                                    | 0.5                                    | ~200               | 210          | 2           |
| 8 wt% AlCl <sub>3</sub>              | 0.5                                    | 1.0                                    | 50                 | ~235         | 3           |
| 8% polydimethylsiloxane              | 0.5                                    | 1.5                                    | 100                | 300          | 4           |
| 20 mM Boric acid                     | 0.25                                   | 0.5                                    | <80                | 215          | 5           |
| 0.15 M LiDFOB                        | 1                                      | 1                                      | ~100               | 300          | 6           |
| 60 mM InF <sub>3</sub>               | 1                                      | 1                                      | 100                | 200          | 7           |
| 1.2 mM CTAC                          | 1                                      | 0.5                                    | ~69                | 300          | 8           |
| 5% Lithium Nitrate                   | 0.5                                    | 0.5                                    | 52                 | 150          | 9           |
|                                      | 1                                      | 0.5                                    | ~100               | 400          | <b>This</b> |
| 5% OP-10                             | 2                                      | 1                                      | ~130.2             | 200          |             |
|                                      | 4                                      | 1                                      | ~188.5             | 160          | <b>Work</b> |

**Supplementary Table 2.** The corresponding fitting results of the Supplementary Figure 5

| <b>Fitting results</b> |                 |       |          |
|------------------------|-----------------|-------|----------|
|                        |                 | Blank | 5% OP-10 |
| Before cycle           | $R_{ct}$ (ohm)  | 140.5 | 156.2    |
|                        | $R_{SEI}$ (ohm) | 345.4 | 32.36    |
| 100th cycle            | $R_{ct}$ (ohm)  | 143.6 | 28.88    |

**Supplementary Table 3.** Elements content of Li surface measured by EDX method with or without OP-10 additives

| Sample   | C (%) | O (%) | F (%) | P (%) |
|----------|-------|-------|-------|-------|
| Blank    | 12    | 49    | 20    | 19    |
| 5% OP-10 | 8     | 33    | 34    | 25    |

**Supplementary Table 4.** The corresponding fitting results of the Supplementary Figure 17

|              |                 | <b>Fitting results</b> |           |          |
|--------------|-----------------|------------------------|-----------|----------|
|              |                 | Blank                  | 5% PEGDME | 5% OP-10 |
| Before cycle | $R_{ct}$ (ohm)  | 154.2                  | 466.6     | 210.1    |
|              | $R_{SEI}$ (ohm) | 302.3                  | 76.27     | 68.5     |
| 500th cycle  | $R_{ct}$ (ohm)  | 23.96                  | 138.7     | 76.32    |

### Supplementary References

- 1 Yoo, D., Kim, K. & Choi, J. The synergistic effect of cation and anion of an ionic liquid additive for lithium metal anodes. *Adv. Energy Mater.* **8**, 1702744 (2018).
- 2 Zheng, J. et al. Electrolyte additive enabled fast charging and stable cycling lithium metal batteries. *Nat. Energy* **2**, 17012 (2017).
- 3 Ye, H. et al. Synergism of Al-containing solid electrolyte interphase layer and Al-based colloidal particles for stable lithium anode. *Nano Energy* **36**, 411–417 (2017).
- 4 Meng, J., Chu, F., Hu, J. & Li, C. Liquid polydimethylsiloxane grafting to enable dendrite-free Li plating for highly reversible Li-metal batteries. *Adv. Funct. Mater.* **29**, 1902220 (2019).
- 5 Huang, Z. et al. Protecting the Li-metal anode in a Li-O<sub>2</sub> battery by using boric acid as an SEI-forming additive. *Adv. Mater.* **30**, 1803270 (2018).
- 6 Yu, L. et al. A localized high-concentration electrolyte with optimized solvents and lithium difluoro(oxalate)borate additive for stable lithium metal batteries. *ACS Energy Lett.* **3**, 2059–2067 (2018).
- 7 Pang, Q., Liang, X., Kochetkov, I., Hartmann, P. & Nazar, L. Stabilizing lithium plating by a biphasic surface layer formed in situ. *Angew. Chem. Int. Ed.* **57**, 9795–9798 (2018).
- 8 Dai, H., Xi, K., Liu, X., Lai, C. & Zhang, S. Q. Cationic surfactant-based electrolyte additives for uniform lithium deposition via lithiophobic repulsion mechanisms. *J. Am. Chem. Soc.* **140**, 17515–17521 (2018).
- 9 Tan, S.-J. et al. Nitriding-interface-regulated lithium plating enables flame-retardant electrolytes for high-voltage lithium metal batteries. *Angew. Chem. Int. Ed.* **58**, 7802–7807 (2019).
